# Supplementary material
Source: PubMed Central journal article supplement (PMC7480015)

## Supplement

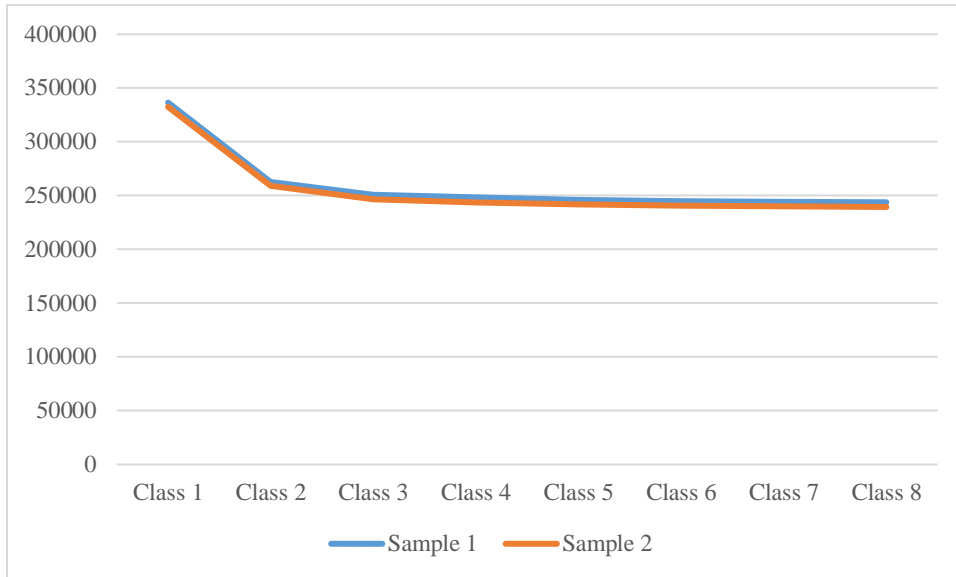

Supplementary Figure. Elbow plot of the information criteria for Samples 1 and 2

Supplement: NIHMS1622741-supplement-1.pdf [file NIHMS1622741-supplement-1.pdf]
